# Supplementary material
Source: publisher site journal article supplement (https://www.kjim.org/upload/media/kjim-2023-357-Supplementary-Table-2.pdf)
Supplement: Supplementary file 1 [file kjim-2023-357-Supplementary-Table-2.pdf]

**Supplementary Table 2. Patient Severity classification**

| Subgroup          | Definition                                                       | Hospitalized | Oxygen therapy/<br>medical care | IMV | MV or<br>ECMO |
|-------------------|------------------------------------------------------------------|--------------|---------------------------------|-----|---------------|
| No oxygen         | Not hospitalized or hospitalized for reasons other than COVID-19 | X            |                                 |     |               |
|                   | Hospitalized but dose not require oxygen supplementation         | O            | X/O                             |     |               |
| Oxygen without MV | Hospitalized and required conventional oxygen                    | O            | O/O                             |     |               |
|                   | Hospitalized and required HFNC oxygen or NIV                     | O            |                                 | O   |               |
| MV                | Hospitalized and required MV or ECMO                             | O            | O/O                             | O   | O             |

ECMO, extracorporeal membrane oxygenation; HFNC, high flow nasal cannula; IMV, invasive mechanical ventilation; MV, mechanical ventilation; NIV, non-invasive ventilation.
